# Supplementary material
Source: publisher site journal article supplement (https://static.cambridge.org/content/id/urn:cambridge.org:id:article:S1355617719001322/resource/name/S1355617719001322supp001.docx)
Supplement: Supplementary file 1 [file S1355617719001322supp001.docx]

Supplementary Table 1

*Comparison of neuropsychological tests between cognitive groups in Parkinson’s disease cohort*

| Variable | | PD-NC | PD-MCI | *p* |
| --- | --- | --- | --- | --- |
| Memory | |  |  |  |
|  | CVLT learning | 0.05 (-3.00 – 2.32) | -1.65 (-3.00 – 1.10) | .001** |
|  | CVLT delayed recall | -0.42 (-3.00 – 1.40) | -1.29 (-3.00 – 0.77) | .01* |
|  | ROCFT delayed recall | 0.97 (-0.83 – 3.15) | -0.09 (-1.92 – 1.57) | <.001** |
| Attention | |  |  |  |
|  | d2-R error percentage | 0.30 (-2.33 – 1.48) | -0.06 (-3.00 – 1.65 | .12 |
|  | d2-R concentration performance | -0.92 (-1.89 – 0.41) | -1.65 (-3.00 – 0.31) | .003** |
|  | Letter-Number-Sequencing | 0.67 (-0.33 – 1.67) | 0.00 (-2.00 - 1.33) | .009** |
| Executive function | |  |  |  |
|  | RWT letters | 0.70 (-0.36 – 2.05) | 0.18 (-2.33 – 2.06) | .11 |
|  | RWT animals | 1.28 (-0.56 – 2.33) | -0.12 (-2.33 – 2.05) | .001** |
|  | MWCST | -0.30 (-1.20 – 1.10) | -1.55 (-3.20 – 0.80) | <.001** |
| Visuospatial function | |  |  |  |
|  | ROCFT copy | 1.04 (-2.12 - 1.91) | 0.76 (-4.5 – 1.61) | .03* |
|  | Benton Line Orientation | 0.04 (-2.27 – 1.36) | -1.35 (-3.08 – 1.26) | .006** |
| Language | |  |  |  |
|  | Boston Naming Test | 0.60 (-0.80 – 1.50) | -0.40 (-2.6-1.9) | .03* |
|  | auditory speech  comprehension°, *raw score* | 18 (17-18) | 18 (12-18) | .03* |

*Note.* If not otherwise indicated, values are given as Median (range) for *z*-scores. CVLT = California Verbal Learning Test; ROCFT = Rey-Osterrieth Complex Figure; d2-R = d2-Revision; RWT = Regensburger word fluency test; MWCST = Modified Wisconsin Card Sorting Test.
° This test was not included in the calculation of the domain score as no z-scores were computable. Impairment was determined based on the test manual: 17-18 no impairment, 15-16 mild impairment, 13-14 moderate impairment, 0-12 strong impairment.
* *p* < .05.
** *p* < .01.
